# Supplementary material for: A template-free synthesis of mesoporous SrTiO3 single crystals
Source: Royal Society of Chemistry journal article supplement (doi:10.1039/d1ce00484k), 2021-01-01
Supplement: d1ce00484k1.pdf [file d1ce00484k1.pdf]

## Supporting Information

### Template-free synthesis of mesoporous SrTiO<sub>3</sub> single crystals

Ji Ping Zhu<sup>a†</sup>, Xue Feng Wu<sup>a†</sup>, Xiao Hua Yang<sup>a</sup>, Peng Fei Liu<sup>a</sup>, Sheng Dai<sup>b\*</sup>, Hua Gui Yang<sup>a\*</sup>

<sup>a</sup> Key Laboratory for Ultrafine Materials of Ministry of Education, Shanghai Engineering Research Center of Hierarchical Nanomaterials, School of Materials Science and Engineering, East China University of Science and Technology, 130 Meilong Road, Shanghai 200237, China.

<sup>b</sup> Key Laboratory for Advanced Materials and Feringa Nobel Prize Scientist Joint Research Center, Institute of Fine Chemicals, School of Chemistry and Molecular Engineering, East China University of Science and Technology, 130 Meilong Road, Shanghai 200237, China.

<sup>†</sup> These authors contributed equally to this work.

Emails: hgyang@ecust.edu.cn; shengdai@ecust.edu.cn

## **Experimental Section**

**Characterization:** XRD patterns were recorded with a Rigaku D/MAX 2550VB diffractometer using Cu K $\alpha$  radiation at 40 kV and 100 mA at a scanning rate of 8 °/min. Scanning electron microscopy (SEM), and transmission electron microscopy (TEM) characterizations were conducted using a HITACHI S4800 and a Thermo Fisher Scientific Talos F200X, respectively. The Brunauer-Emmett-Teller (BET) method was utilized to calculate the specific surface area. The pore volumes and pore size distributions were derived from the desorption branches of isotherms using the Barrett-Joyner-Halenda (BJH) model. XPS was recorded on an AXIS ULTRA DLD XPS SYSTEM with MONO Al source (Shimadzu Crop), and the binding energy of the C 1s peak at 284.8 eV was taken as an internal reference. UV-vis spectra were recorded with a Shimadzu UV-2550.

**Film preparation and EIS analysis:** 10 mg catalyst was well dispersed in 100  $\mu$ L dimethyl formamide (DMF) and 50  $\mu$ L Nafion solution by ultrasonication for 30 minutes. Then 20  $\mu$ L slurry was dropped onto the prepared 1 cm  $\times$  1 cm FTO glass and dried naturally. Electrochemical impedance spectroscopy (EIS) measurements were carried out with a CHI760E workstation in a standard three-electrode system. The Pt mesh and Ag/AgCl (3.5 M KCl) electrode were used as the counter electrode and the reference electrode respectively, and 0.5 M Na<sub>2</sub>SO<sub>4</sub> aqueous solution was used as the electrolyte.

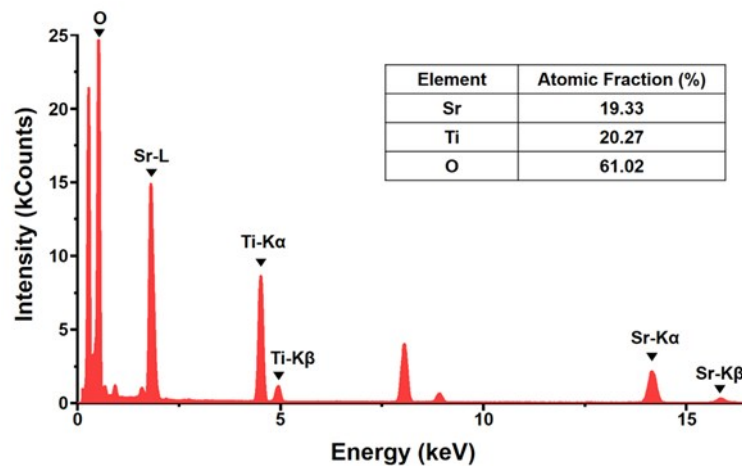

**Fig. S1** The EDS spectrum of MSC  $\text{SrTiO}_3$ -48h and corresponding element ratio, indicating that the atomic ratio of Sr, Ti, O is nearly 1:1:3. The unindexed signals are corresponding to C and Cu originated from TEM grid (0.28 keV for C, 8.03 keV for Cu  $K\alpha$  and 8.91 keV for Cu  $K\beta$ ).

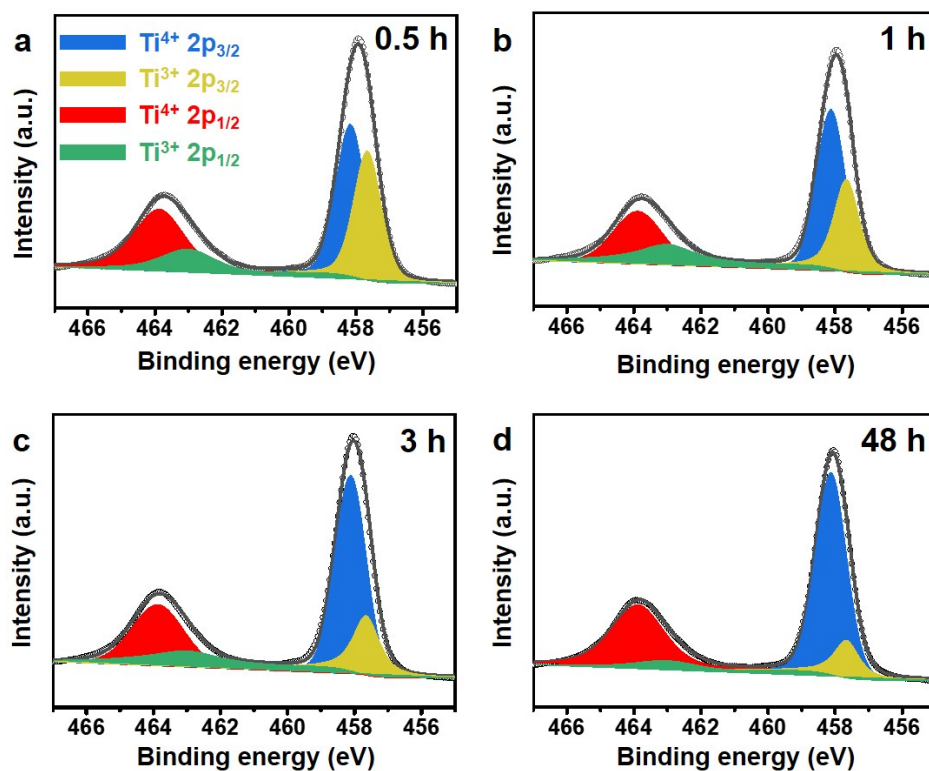

**Fig. S2** (a-d) Time-dependent XPS spectra of MSC SrTiO<sub>3</sub> in the Ti 2p region collected at different synthesis stages of (a) 0.5 h, (b) 1 h, (c) 3h, and (d) 48 h, respectively, showing that the decreased content of Ti<sup>3+</sup> during the synthesis.

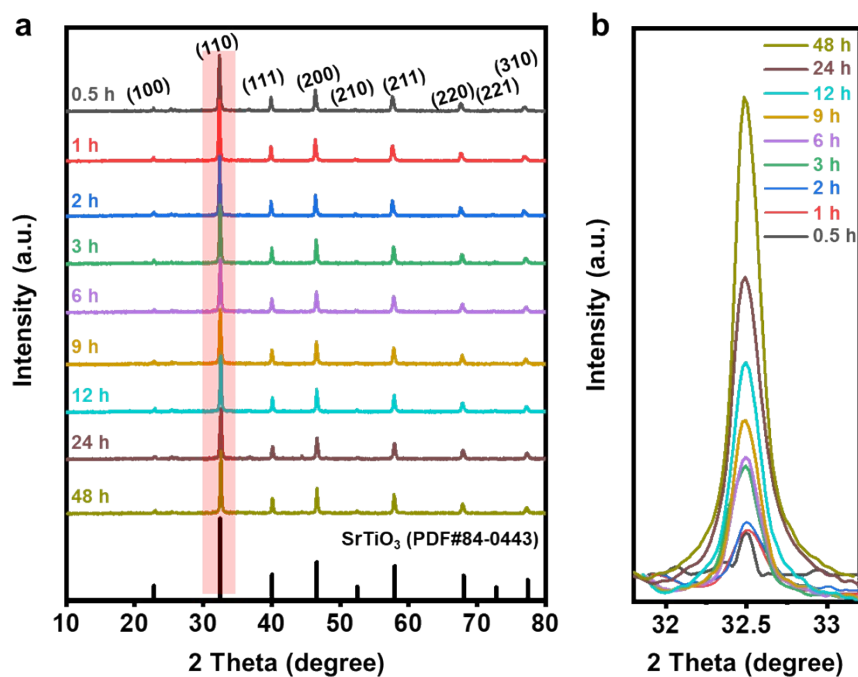

**Fig. S3** Powder XRD analysis of the as synthesized SrTiO<sub>3</sub> at different reaction stages from 0.5 to 48 h of (a) the normalized patterns and (b) the practical intensity of characteristic (110) peak, showing the enhanced crystallinity with prolonging the reaction time, which is consistent with the SEM and TEM images.

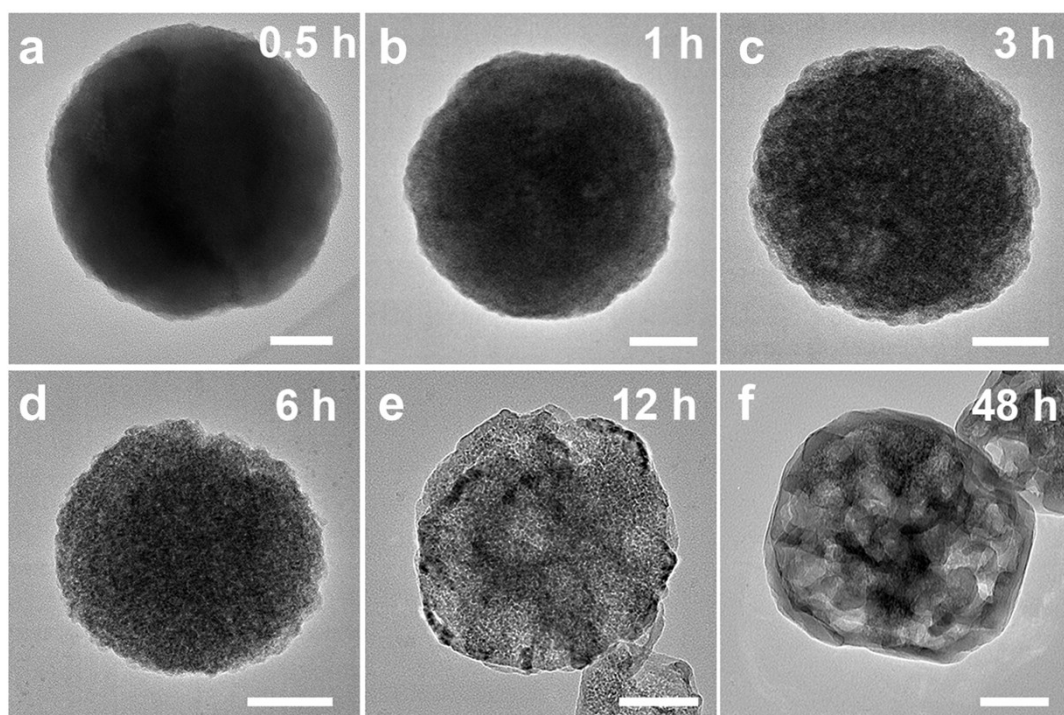

**Fig. S4** TEM images of the crystallization process of MSC SrTiO<sub>3</sub> at different reaction states of (a) 0.5 h, (b) 1 h, (c) 3 h, (d) 6 h, (e) 12 h, and (f) 48 h, respectively, displaying the visual formation process of MSC SrTiO<sub>3</sub>. Scale bars in (a-f): 50 nm.

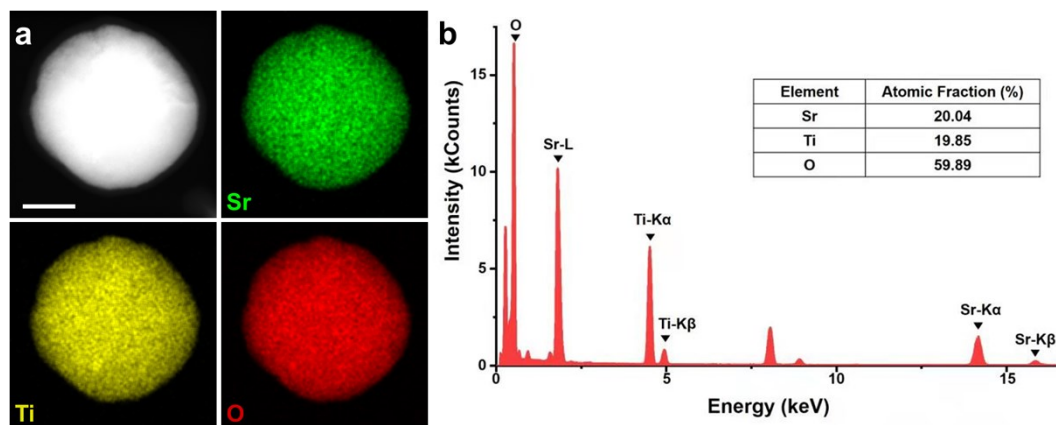

**Fig. S5** (a) Typical HAADF-STEM image of SrTiO<sub>3</sub> at 0.5 h and corresponding EDS maps of Sr, Ti, and O, showing the homogeneous distribution over the SrTiO<sub>3</sub> particle. Scale bar: 50 nm. (b) The EDS spectrum of MSC SrTiO<sub>3</sub>-0.5h and corresponding element ratio, indicating that the atomic ratio of Sr, Ti, O is nearly 1:1:3. The unindexed signals are corresponding to C and Cu originated from TEM grid (0.28 keV for C, 8.03 keV for Cu Kα and 8.91 keV for Cu Kβ).

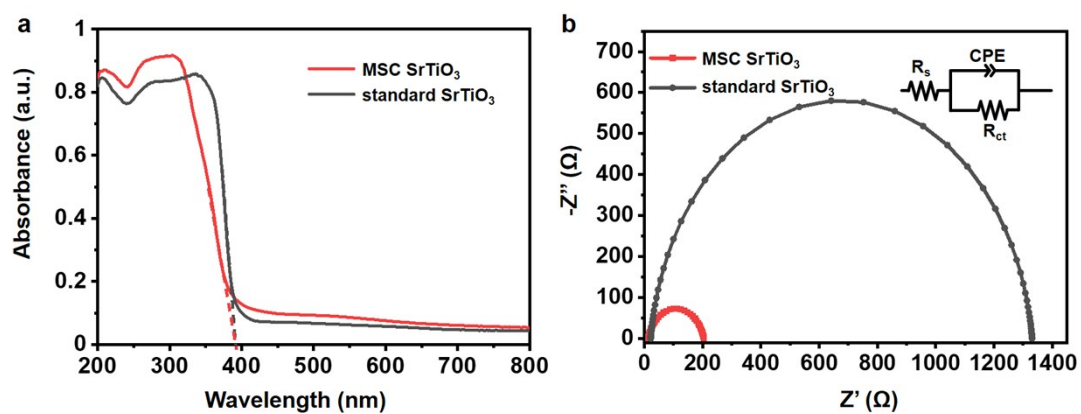

**Fig. S6** (a) UV-vis spectra and (b) EIS spectra of MSC and standard SrTiO<sub>3</sub>, which suggest the mesoporous single crystals would not significantly change the light absorption but accelerate the charge transfer ability.



**Table S1** Calculated area ratio of  $O_v/O_{latt}$  collected at different reaction time.

| Sample (time)                | 0.5 h | 1 h  | 3 h  | 48 h |
|------------------------------|-------|------|------|------|
| Area ratio of $O_v/O_{latt}$ | 2.2   | 1.76 | 1.37 | 0.36 |

**Table S2** The average interplanar spacing of (110) and (020) facets, calculated from SAED.

| Time (h) | $d_{110}$ (Å) | $d_{020}$ (Å) |
|----------|---------------|---------------|
| 0.5      | 2.83          | 1.99          |
| 1.0      | 2.82          | 1.98          |
| 3.0      | 2.77          | 1.96          |
| 48       | 2.75          | 1.95          |
